# Supplementary material for: Synergy of PVP and ethanol to synthesize Ni3S4 quantum dots for high-performance asymmetric supercapacitors
Source: Royal Society of Chemistry journal article supplement (doi:10.1039/d0qm00201a), 2020-01-01
Supplement: d0qm00201a1.pdf [file d0qm00201a1.pdf]

## Supporting Information

### Synergy of PVP and ethanol to synthesize Ni<sub>3</sub>S<sub>4</sub> quantum dots for high-performance asymmetric supercapacitors

Jinfeng Zheng <sup>a</sup>, Xiao Lian <sup>a</sup>, Mingzai Wu <sup>b</sup>, Fangcai Zheng <sup>c</sup>, Yuanhao Gao <sup>d</sup>, and Helin Niu<sup>\*a</sup>

*a. Anhui Province Key Laboratory of Chemistry for Inorganic/Organic Hybrid Functionalized Materials, Institutes of Physical Science and Information Technology, Key Laboratory of Structure and Functional Regulation of Hybrid Materials of Ministry of Education, Anhui University, Hefei 230601, China.*

*b. School of Physics and Materials Science, Anhui University, Hefei 230039, China.*

*c. Institutes of Physical Science and information Technology, Anhui University, Hefei 230039, China.*

*d. Key Lab Micronano Mat Energy Storage, Xuchang University, Xuchang 461000, China.*

\*Corresponding author. Email: niuhelin@ahu.edu.cn.

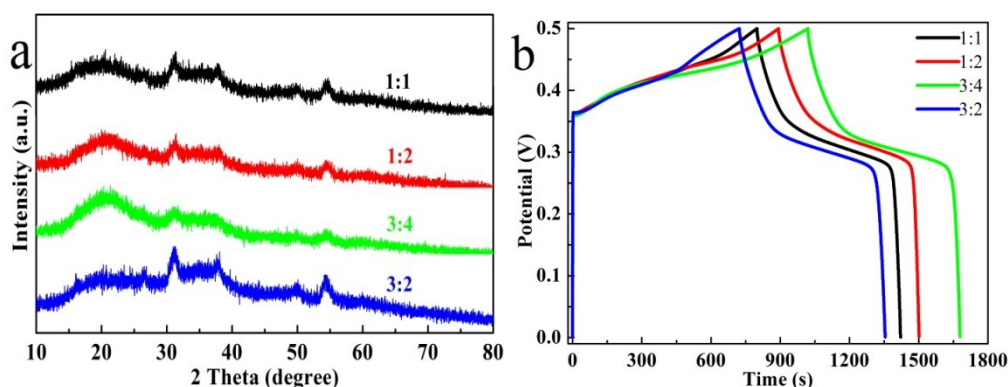

**Fig. S1** The amounts of NiCl<sub>2</sub>·6H<sub>2</sub>O and Na<sub>2</sub>S<sub>2</sub>O<sub>3</sub>·5H<sub>2</sub>O were fixed at 7 mmol and PVP was fixed at 1g. Ni<sub>3</sub>S<sub>4</sub> QDs was prepared by adding different ratios of NiCl<sub>2</sub>·6H<sub>2</sub>O and Na<sub>2</sub>S<sub>2</sub>O<sub>3</sub>·5H<sub>2</sub>O, which were 1:1, 1:2, 3:4, 3:2 respectively. The obtained products were Ni<sub>3</sub>S<sub>4</sub> by XRD analysis (Fig. a). Fig. b is the charge and discharge curves of the four materials.

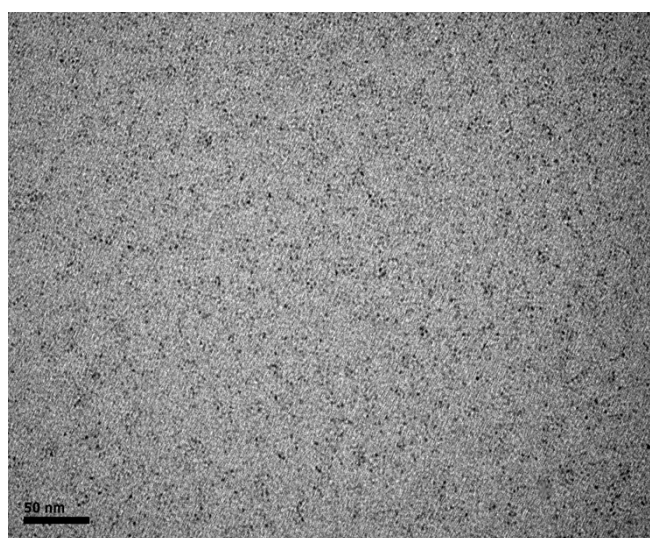

**Fig. S2** TEM image of Ni<sub>3</sub>S<sub>4</sub> QDs (P1).

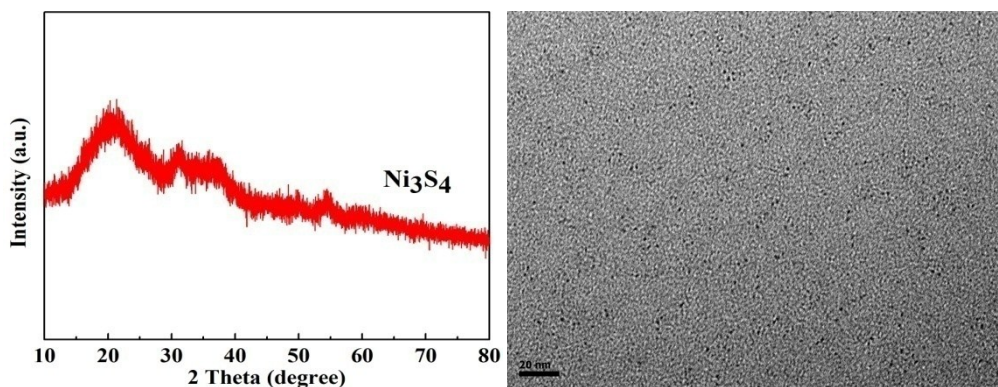

**Fig. S3** In the process of preparing  $\text{Ni}_3\text{S}_4$  QDs, 1 g of PVP was added, and the obtained product was analyzed by XRD and TEM.

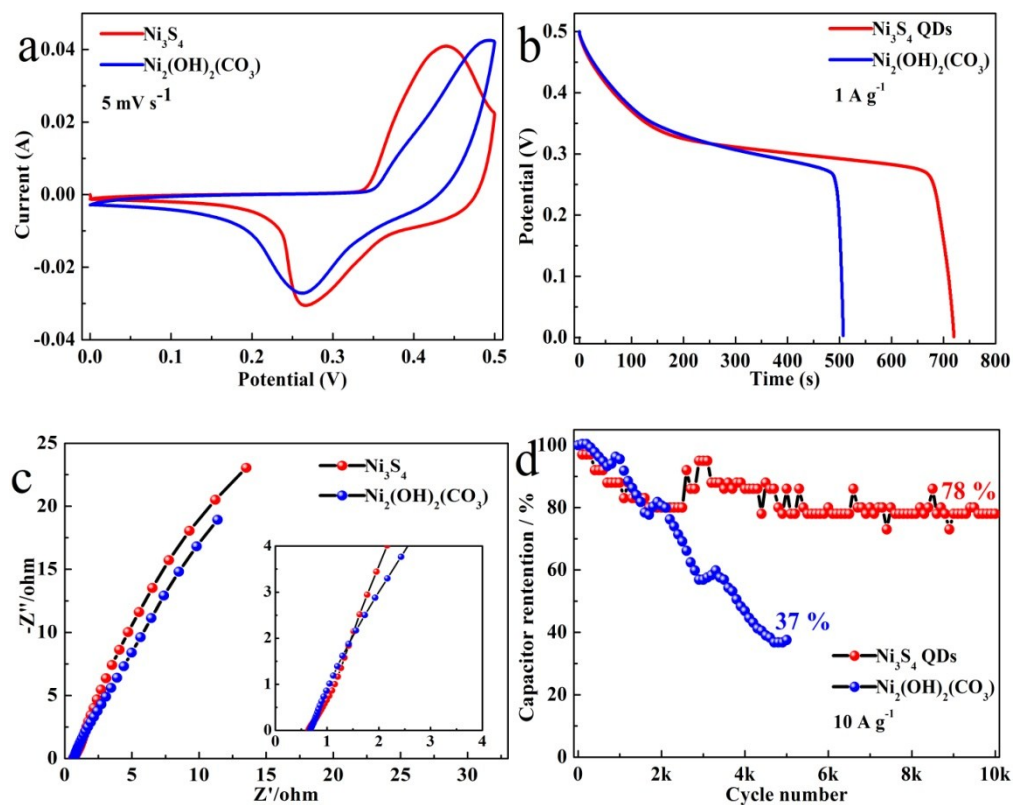

**Fig. S4** Comparing the electrochemical properties of  $\text{Ni}_3\text{S}_4$  QDs and  $\text{Ni}_2(\text{OH})_2(\text{CO}_3)$ : (a) CV curve, (b) Discharge curve, (c) Nyquist plot of EIS, (d) Cyclic stability. It can be seen from the figure that  $\text{Ni}_3\text{S}_4$  QDs has better electrochemical performance than  $\text{Ni}_2(\text{OH})_2(\text{CO}_3)$ .

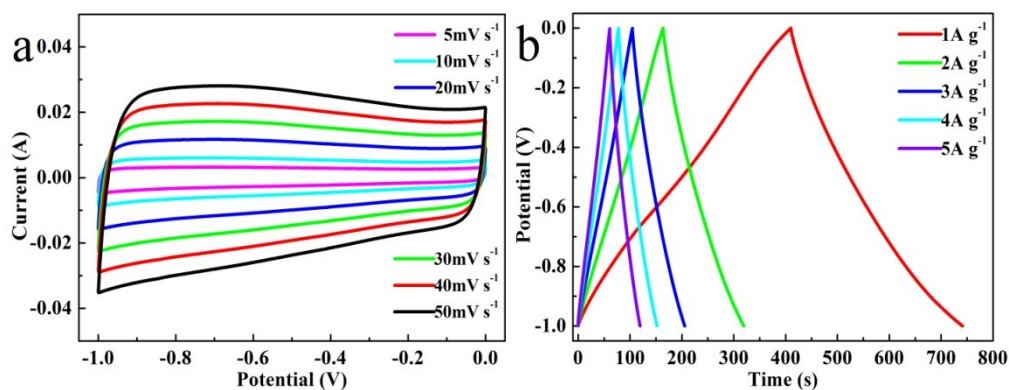

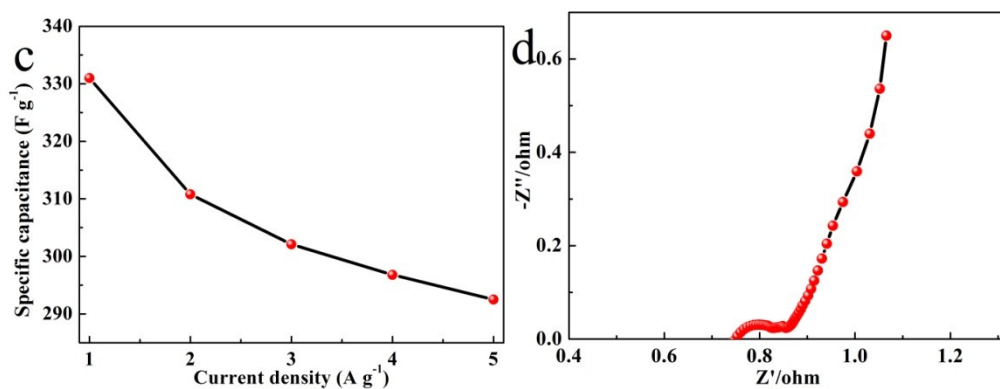

**Fig. S5** Electrochemical properties of activated carbon (AC, YEC-8A). (a) CV curve, (b) GCD curve, (c) Specific capacitance at different current densities, (d) Nyquist plot of EIS. It can be seen from Fig. a that all CV curves are rectangular, and there is no redox peak, showing the characteristics of a typical electric double layer capacitor. As shown in Fig. b, all GCD curves are almost symmetrical at different current densities, confirming that AC has good reversibility. As shown in Fig. c, the specific capacitance value of AC can reach 331 F g<sup>-1</sup> at a current density of 1 A g<sup>-1</sup>. Fig. d is the EIS spectra of AC, the low equivalent series resistance reflects the easy transmission of electrons.

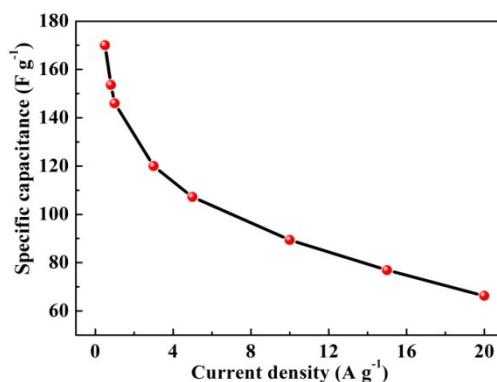

**Fig. S6** Specific capacitance of Ni<sub>3</sub>S<sub>4</sub> QDs//AC-ASC at different current densities.
